# Supplementary material for: Functional Dependency as a Marker for Positive SARC-F Screen among Older Persons at the Emergency Department
Source: PubMed Central journal article supplement — Ann Geriatr Med Res. 2024 Jul 2;28(4):401–9. doi: 10.4235/agmr.24.0091 (PMC11695766; doi:10.4235/agmr.24.0091), 2024-07-02

**Supplementary Figure 1.** Emergency Department Interventions for Frailty (EDIFY) study criteria and recruitment diagram.

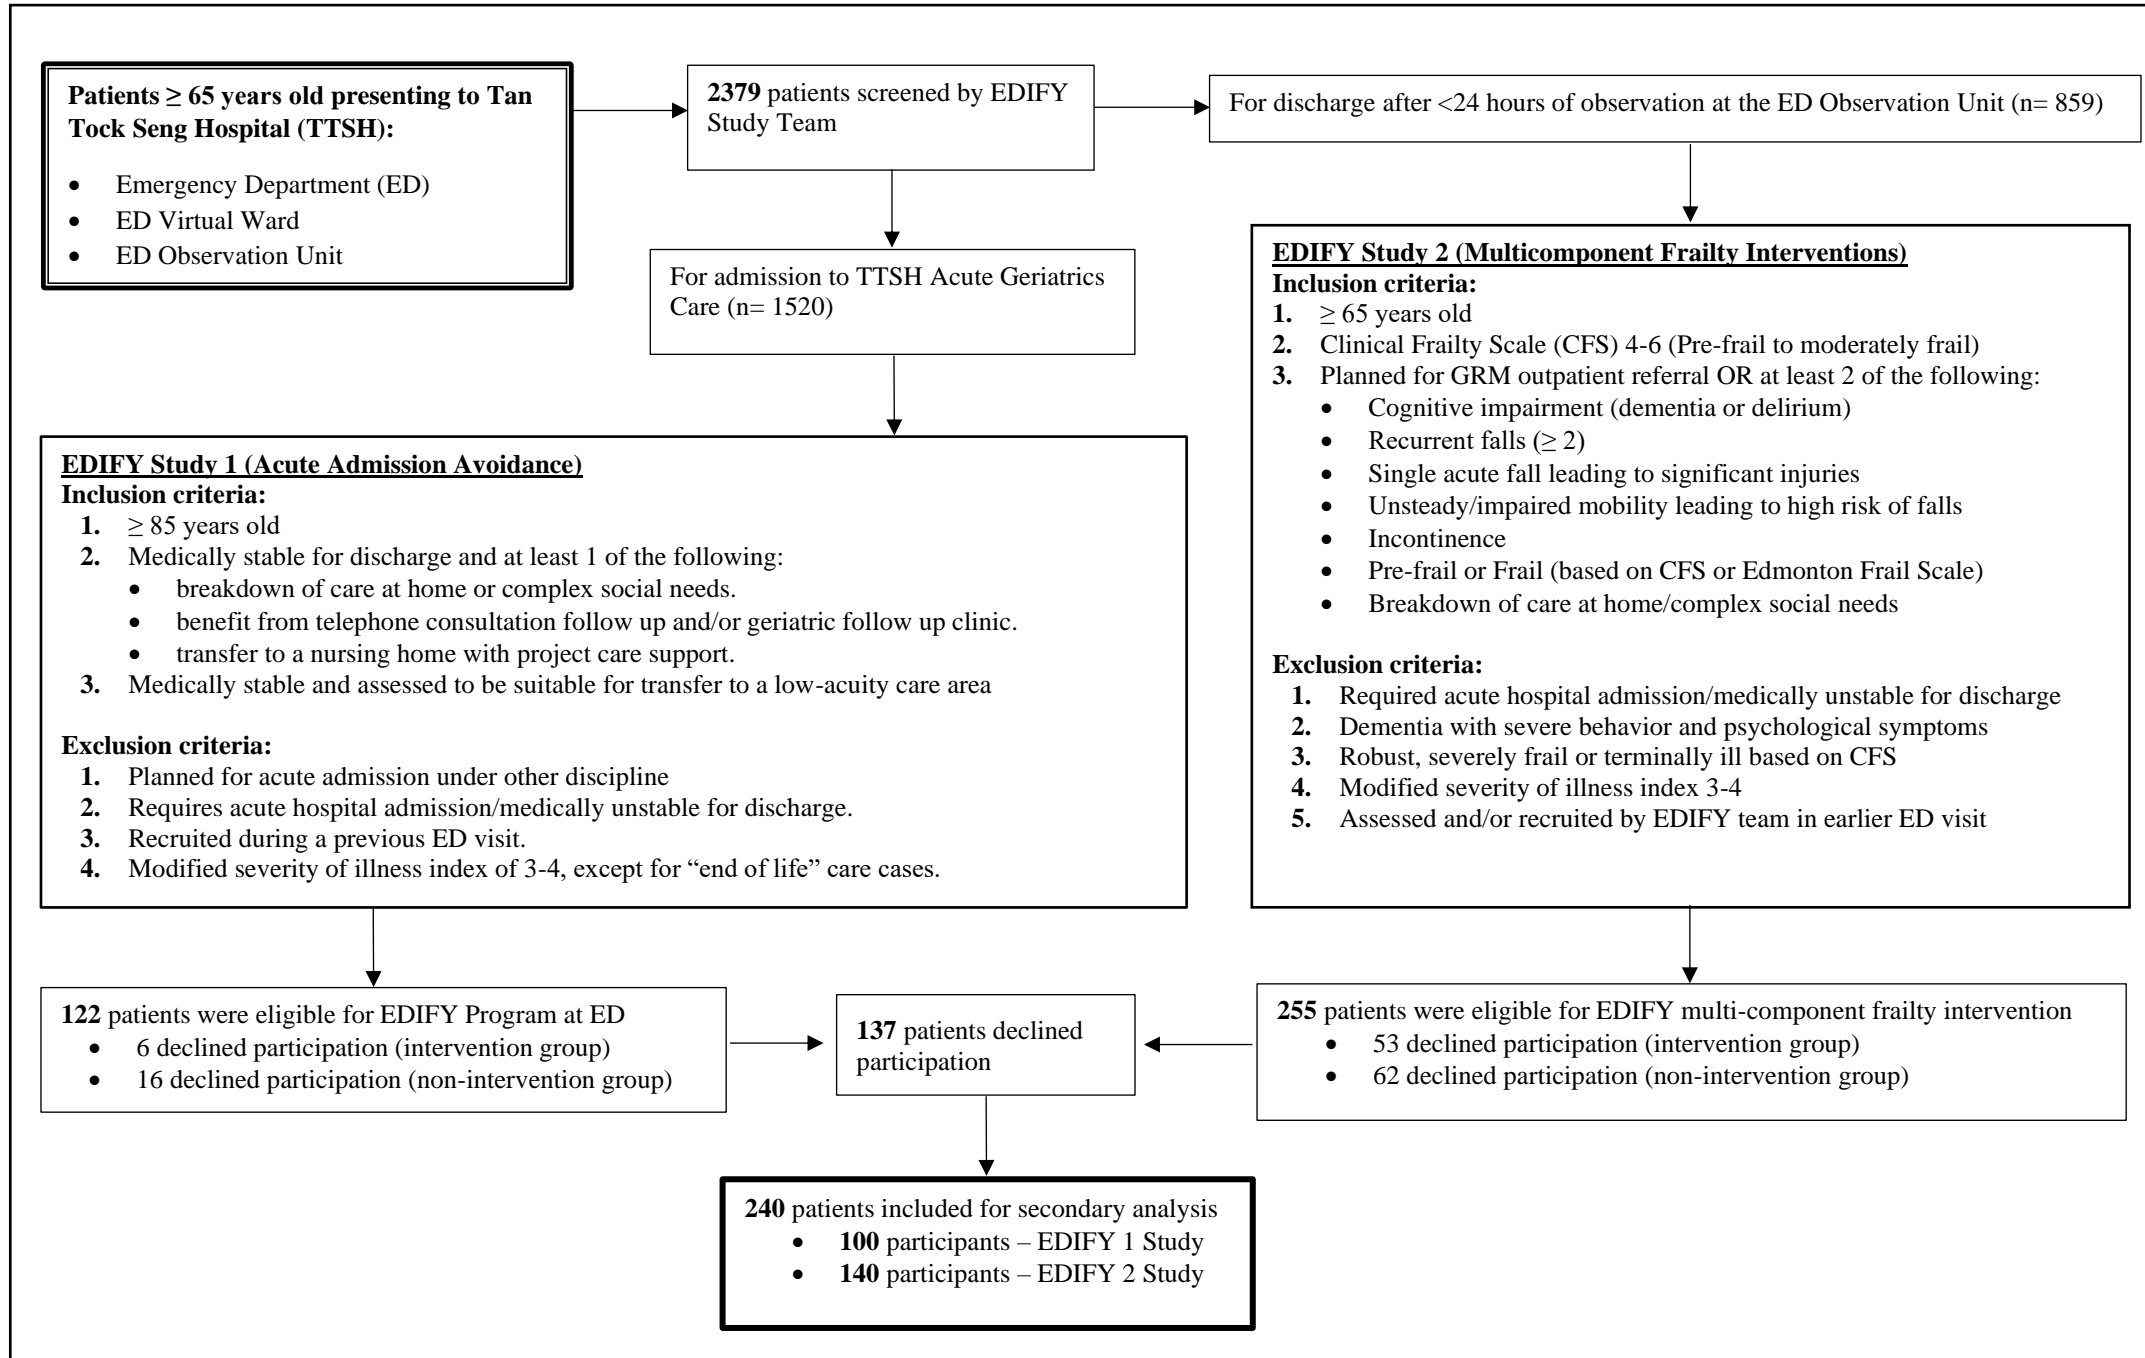

Supplement: agmr-24-0091-Supplementary-Fig-S1.pdf [file agmr-24-0091-Supplementary-Fig-S1.pdf]
